# Supplementary material for: Two distinct pathways of pregranulosa cell differentiation support follicle formation in the mouse ovary
Source: Proc Natl Acad Sci U S A. 2020 Aug 5;117(33):20015–26. doi: 10.1073/pnas.2005570117 (PMC7443898; doi:10.1073/pnas.2005570117)

## Supplemental Information Appendix

### Supplemental Tables

Table S1. Single cell RNA seq

| Stage | Number of cells | UMI/cell | Genes/cell | Number of ovaries | Reads xE06 | Well aligned |
|-------|-----------------|----------|------------|-------------------|------------|--------------|
| E11.5 | 8,293           | 10,036   | 3,143      | 18                | 513        | 461          |
| E12.5 | 4,744           | 10,984   | 3,214      | 16                | 210        | 181          |
| E14.5 | 11,417          | 6,251    | 2,483      | 18                | 510        | 457          |
| E16.5 | 11,042          | 10,712   | 3,493      | 14                | 558        | 490          |
| E18.5 | 4,118           | 6,704    | 2,426      | 14                | 472        | 371          |
| P1    | 6,409           | 6,995    | 2,229      | 14                | 258        | 217          |
| P5    | 6,519           | 6,512    | 2,245      | 10                | 247        | 208          |

UMI/cell and genes/cell represent averages across the all cell types, and may not be comparable to values for individual cell groups in Datasets S1-S2.

Table S2. Materials list

| Reagents or Antibodies | Producer or Source | Catalog# and Lot #               |
|------------------------|--------------------|----------------------------------|
| <b>Antibodies</b>      |                    |                                  |
| anti-Ddx4              | Abcam              | Cat#Ab13840; Lot#GR294410-1      |
| anti-Ddx4              | Abcam              | Cat#Ab27591; Lot#GR290112-3      |
| anti-YFP               | Aves Labs          | Cat#GFP-1020; Lot#GFP697986      |
| anti-Nr2f2             | R&D Systems        | Cat#PP-H7147-00; Lot#A-2         |
| anti-Sycp3             | Santa Cruz         | Cat#Sc-74568                     |
| anti-Gata4             | Santa Cruz         | Cat#Sc-25310; Lot#H0613          |
| anti-Foxl2             | FISHER             | Cat#NB100-1277SS; Lot#S3-E190816 |
| anti-Coll1a1           | Abcam              | Cat#Ab21286; Lot#GR3186934-8     |
| anti-Pou5f1            | Abcam              | Cat#Ab181557; Lot#GR219675-33    |
| anti-tdTomato          | Origene            | Cat#AB8181-200                   |

|                                                           |                  |                                   |
|-----------------------------------------------------------|------------------|-----------------------------------|
| Id1                                                       | Proteintech      | Cat#18475-1-AP                    |
| <b>Chemicals and Reagents</b>                             |                  |                                   |
| IHC Antigen Retrieval Solution                            | Invitrogen       | Cat#00-4955-58; Lot#2085704       |
| Trypsin-EDTA (0.25%)                                      | Fisher           | Cat#25-200-056                    |
| DAPI                                                      | Sigma-Aldrich    | Cat#D9542                         |
| Diphtheria Toxin from Corynebacterium diphtheriae         | Sigma-Aldrich    | Cat#D0564-1MG                     |
| Vectashied, Mounting medium                               | Vector Labs Inc. | Cat#H-1000                        |
| Tamoxifen                                                 | Sigma-Aldrich    | Cat#T5648-5G; Lot#WXBC1801V       |
| Corn oil                                                  | Sigma-Aldrich    | Cat#C8267-500ML;<br>Lot#MKBW9504V |
| <b>IHC and In situ Kits</b>                               |                  |                                   |
| Mouse and Rabbit Specific HRP/DAB (ABC) Detection IHC kit | Abcam            | Cat#Ab64264; Lot#GR3200245-11     |
| RNASCOPE 2.5 HD DUPLEX REAGENT KIT                        | ACDBio           | Cat#322430; Lot#2004306           |
| <b>Oligonucleotides</b>                                   |                  |                                   |
| Mouse-Wnt6                                                | ACDBio           | Cat#401111                        |
| Mouse-Lgr5                                                | ACDBio           | Cat#312171-C2                     |
| Mouse-Gng13                                               | ACDBio           | Cat#462531                        |
| Mouse-Fmr1                                                | ACDBio           | Cat#496391-C2                     |

Primary and Secondary antibodies used in the immunofluorescence and immunohistochemistry;  
Chemicals used in DT or Tamoxifen injection; mRNA probes and kits used in the in situ hybridization.

## Supplemental Datasets

Dataset S1. Mean mUMI (milliUMI)/cell for each germ cell cluster in Figure 2B

Gene name, cluster 0 (Pre-meiotic), cluster 1 (Pre-leptotene), cluster 2 (Leptotene), cluster 3 (Zygotene), cluster 4 (Pachytene), cluster 5 (Diplotene), cluster 6 (Dictyate), cluster 7 (Dying/nurse cell).

Dataset S2. Mean mUMI (milliUMI)/cell for each somatic cell cluster in Figure 3B

Gene name, cluster 0 (Epithelial\_0), cluster 1 (Epithelial\_1), cluster 2 (Epithelial\_2), cluster 3 (Epithelial\_3), cluster 4 (Bipotential), cluster 5 (B Pre-granulosa\_0), cluster 6 (E Pre-granulosa\_0), cluster 7 (B Pre-granulosa\_1), cluster 8 (E Pre-granulosa\_1), cluster 9 (B Pre-granulosa\_2), cluster 10

(E Pre-granulosa\_2), cluster 11 (B Pre-granulosa\_3), cluster 12 (E Pre-granulosa\_3), cluster 13 (B Pre-granulosa\_4), cluster 14 (E Pre-granulosa\_4), cluster 15 (B Granulosa\_wave1), cluster 16 (E Granulosa\_wave2).

Dataset S3. Marker genes for each germ cell cluster

Gene name, p\_val, avg\_logFC, pct.1, pct.2, p\_val\_adj.

Tabs at the bottom indicate: cluster 0 (Premeiotic), cluster 1 (Pre-Leptotene), cluster 2 (Leptotene), cluster 3 (Zygotene), cluster 4 (Pachytene), cluster 5 (Diplotene), cluster 6 (Diptyate), cluster 7 (Dying/nurse cell).

Dataset S4. Marker genes for each somatic cell cluster

Gene name, p\_val, avg\_logFC, pct.1, pct.2, p\_val\_adj.

Tabs at bottom indicate: cluster 0 (Epithelial\_0), cluster 1 (Epithelial\_1), cluster 2 (Epithelial\_2), cluster 3 (Epithelial\_3), cluster 4 (Bipotential), cluster 5 (B Pre-granulosa\_0), cluster 6 (E Pre-granulosa\_0), cluster 7 (B Pre-granulosa\_1), cluster 8 (E Pre-granulosa\_1), cluster 9 (B Pre-granulosa\_2), cluster 10 (E Pre-granulosa\_2), cluster 11 (B Pre-granulosa\_3), cluster 12 (E Pre-granulosa\_3), cluster 13 (B Pre-granulosa\_4), cluster 14 (E Pre-granulosa\_4), cluster 15 (B Granulosa\_wave1), cluster 16 (E Granulosa\_wave2).

Dataset S5. Genes significantly enriched in Epithelial or Bipotential Pre-Granulosa Cells.

Genes significantly enriched in either the EPG pathway (left, clusters 10, 12, 14, 16) or the BPG pathway (right, clusters 9, 11, 13, 15). Cluster names are listed below the Cluster numbers (Fig. 3B).

For mean expression levels see Dataset S2.

## **Supplemental Figure Legends**

### **Figure S1. Expression of marker genes in perinatal ovaries.**

(A) Ovaries were stained for Nr2f2, Foxl2, and the oocyte marker DDX4 at E12.5 and E18.5. (B) Ovaries were stained for Colla1 and DDX4 at E14.5, and P2. DAPI (nuclear DNA). At E18.5, the Nr2f2-positive mesenchymal cells align in rows that have been likened to cords. Staining mesenchymal cells located between groups of cysts with Colla1 further highlighted these ovarian subdomains, each of which contains several cysts or primordial follicles in E14.5 and P2 ovaries (Figure S1B). (C) Immunofluorescence of E12.5, E13.5, and E14.5 ovaries stained for Pou5f1 and Sycp3, showing the anterior-posterior expression gradient (yellow arrows). boxes: location of regions magnified at right. (D) Quantification of Pou5f1 and Sycp3 expression in fetal germ cells.

### **Figure S2. Heat map of differentially expressed genes for each germline cluster.**

(A) Heat map depicting differentially expressed genes in each germ cell cluster in Fig. 2B (names at top) compared to all other clusters. Colored bars represent UMI expression levels of individual cells to provide information on observed variation in expression, including statistical noise. Genes names are indicated to the right of the heat map. Color scheme is based on z-score distribution from -2 (blue) to 2 (orange).

### **Figure S3. Heat map of differentially expressed genes for each somatic cell cluster.**

(A) Heat map depicting differentially expressed genes in each somatic cell cluster in Fig. 3B compared to all other clusters. Colored bars represent UMI expression levels of individual cells to provide information on observed variation in expression, including statistical noise. Genes names are indicated to the right of the heat map. Color scheme is based on z-score distribution from -2 (blue) to 2 (orange).

### **Figure S4. Common and enriched BPG and EPG genes from E16.5-P5**

(A) The Venn diagrams show the number of common genes in both BPG and EPG pathway, and the number of enriched genes in each pathway from E16.5 to P5. The box at the right lists some top expressed marker genes in each pathway. See Dataset S5 for specific genes in each class.

**Figure S5. *Lgr5*<sup>+</sup> pregranulosa cells from the surface epithelium no longer contribute to second wave follicles at P1.**

(A) Schematic of the lineage tracing strategy. *Lgr5*<sup>CreERT2/+</sup> mice were crossed to R26R<sup>tdT/tdT</sup> reporter mice. Tamoxifen (Tmx) was administrated at P1, and samples were collected at P2 and P6. (B, C) Lineage tracing of *Lgr5*<sup>+</sup> pregranulosa cell progeny showed that tdTomato<sup>+</sup> cells remain at the ovary surface, and do not contribute significantly to second wave follicles by either P2 or P6. Compare to Figure 5F.

**Fig. S1**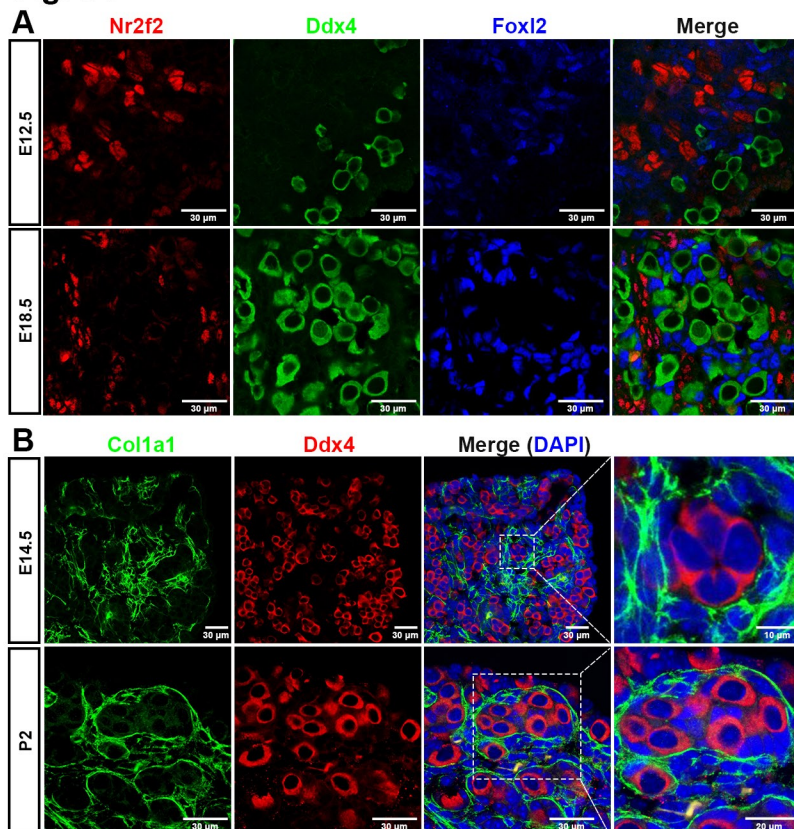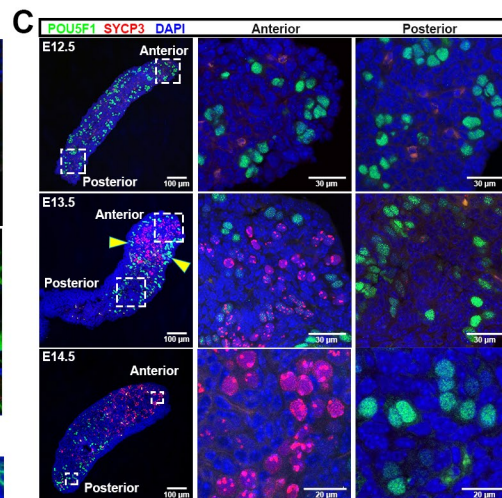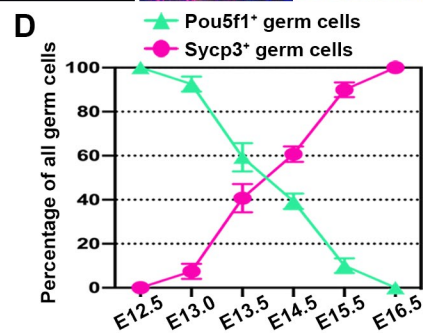

Fig. S2

A

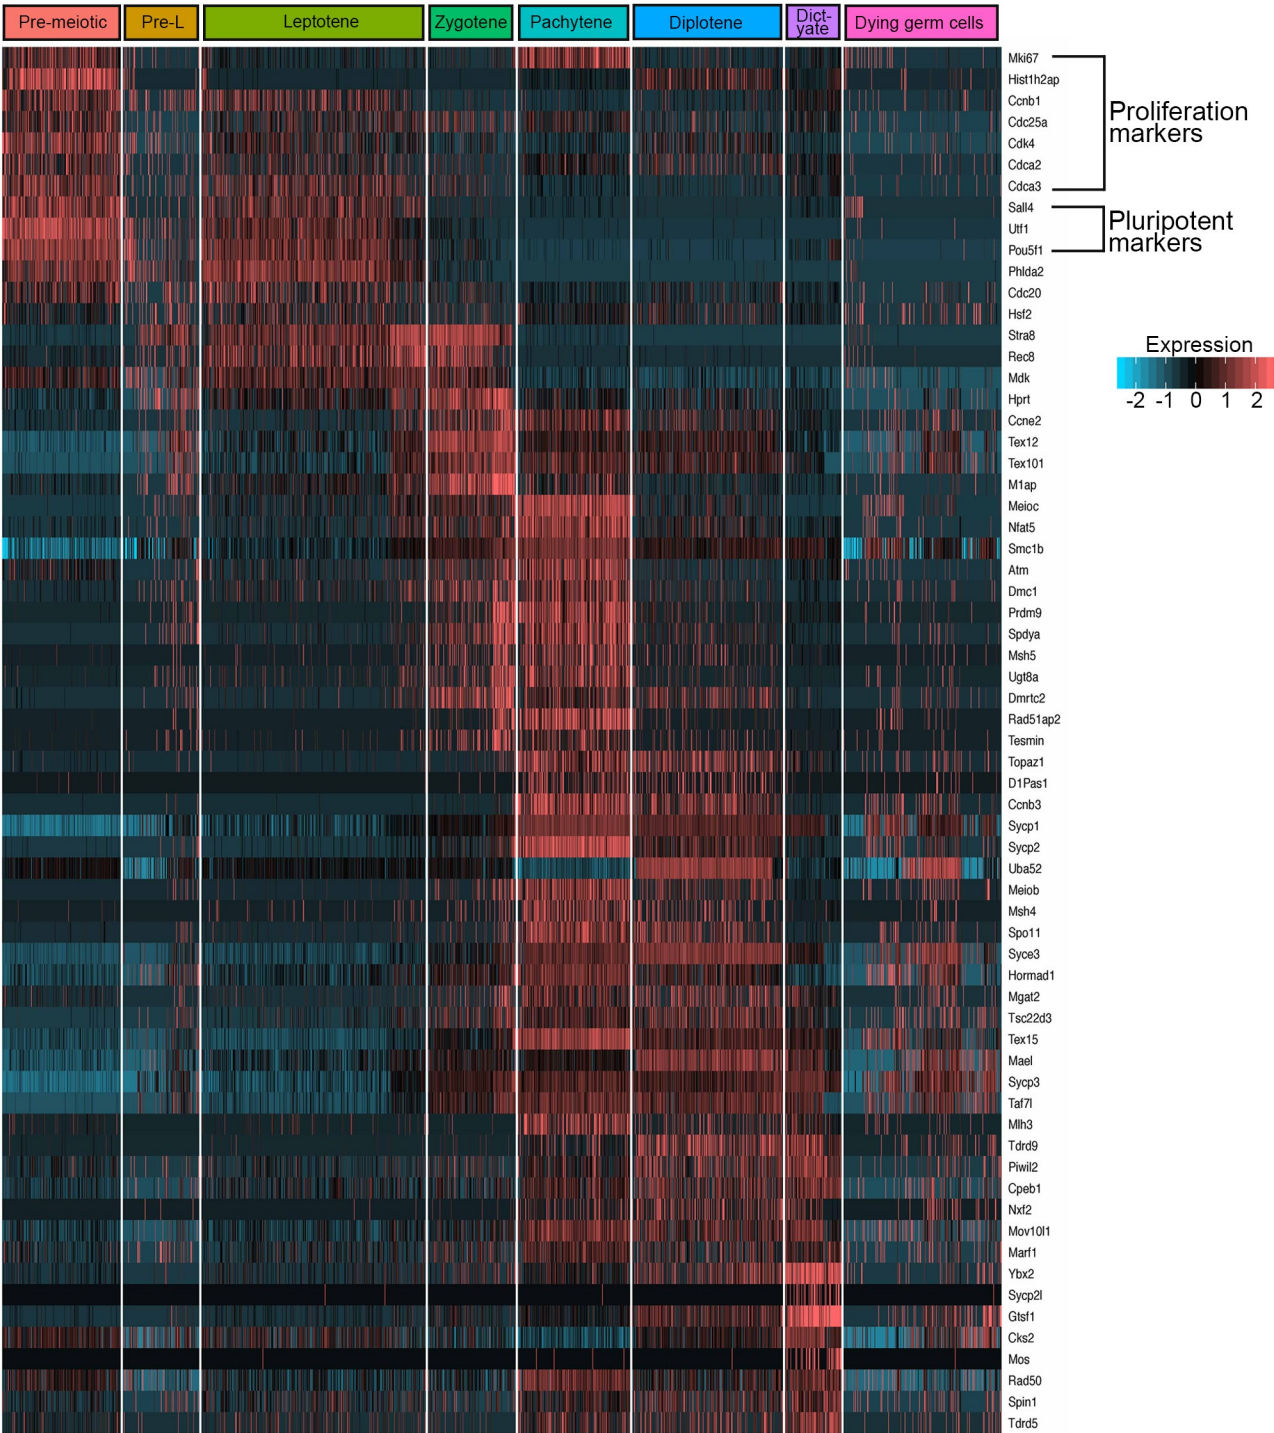

Fig. S3

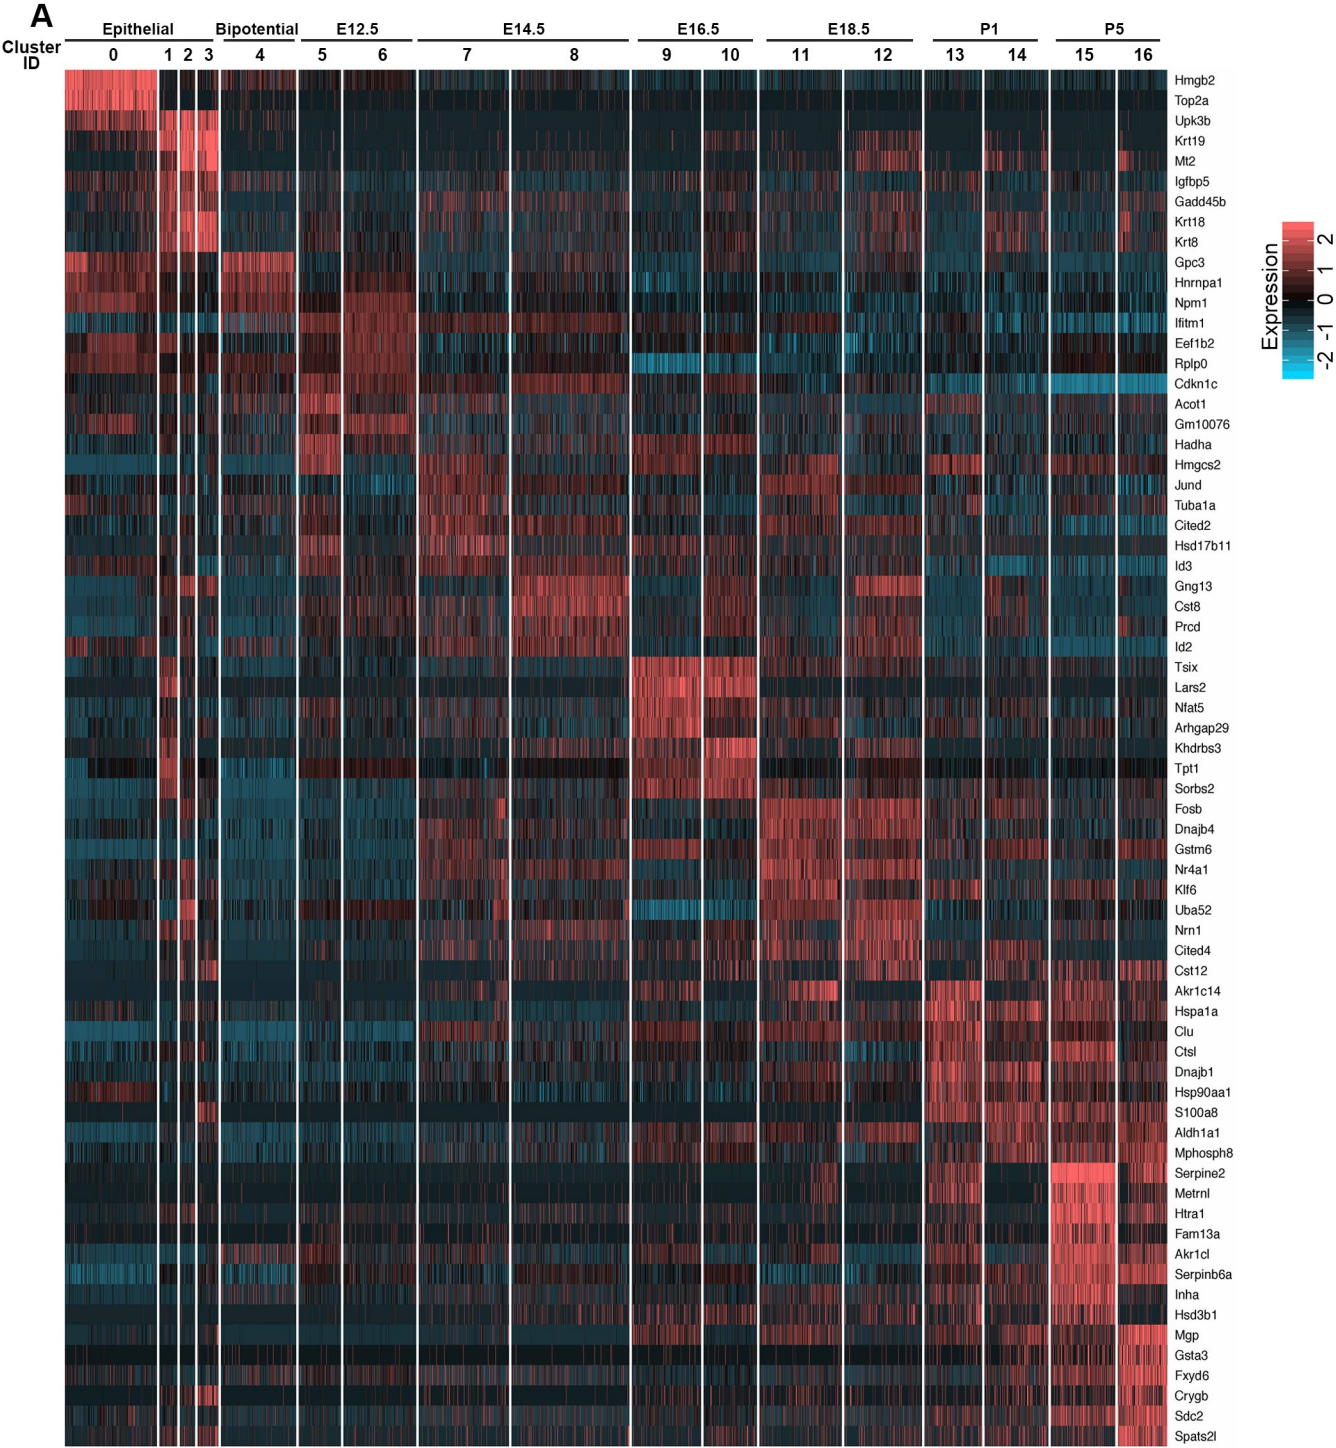

Fig. S4

A

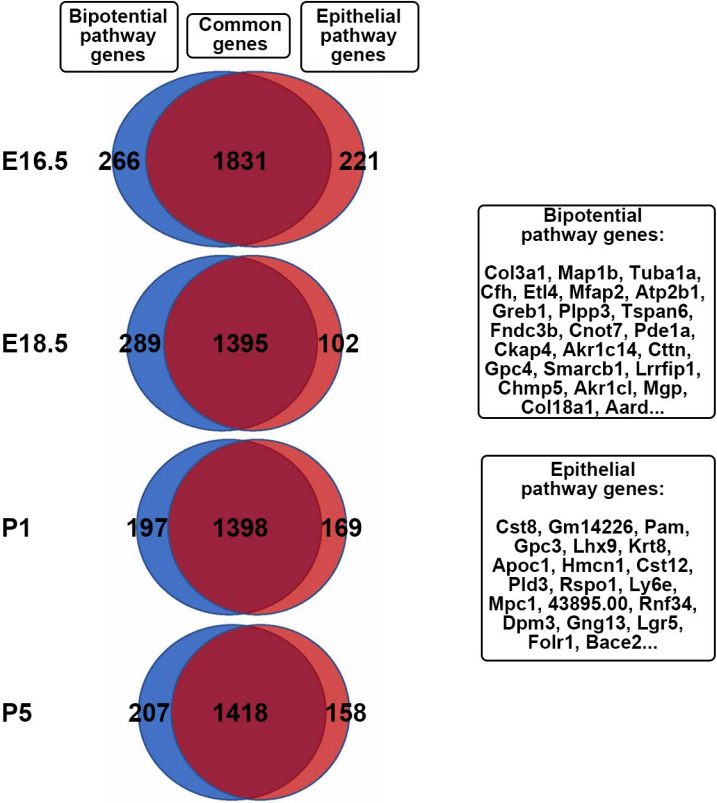

Fig. S5

B tdTomato Ddx4 DAPI

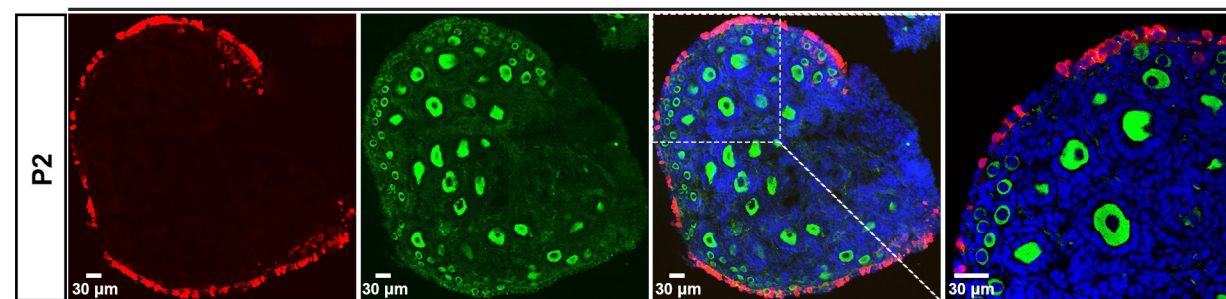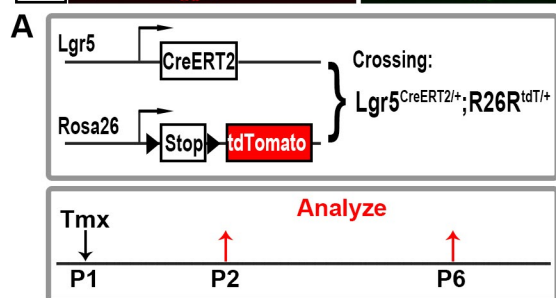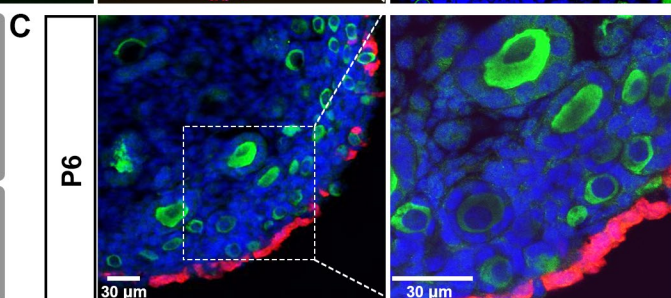

Supplement: Supplementary File [file pnas.2005570117.sapp.pdf]
